# Supplementary material
Source: PubMed Central journal article supplement (PMC10107799)

A)

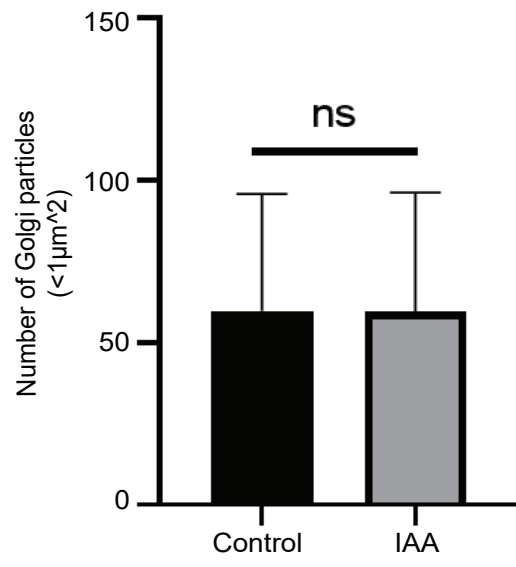

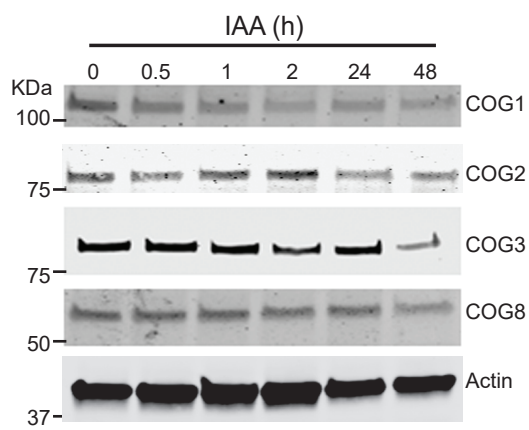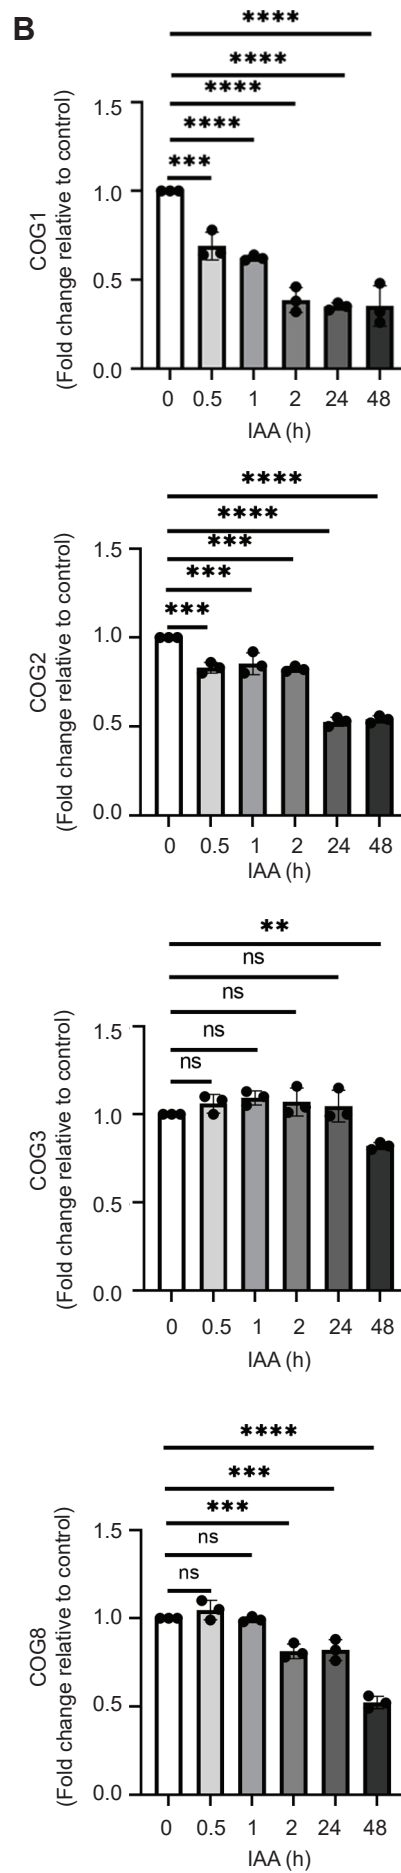

A

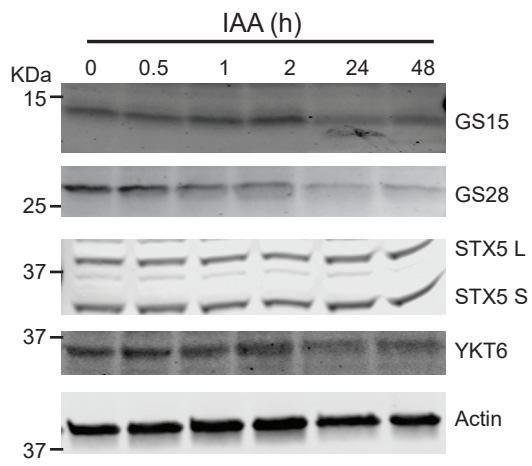

B

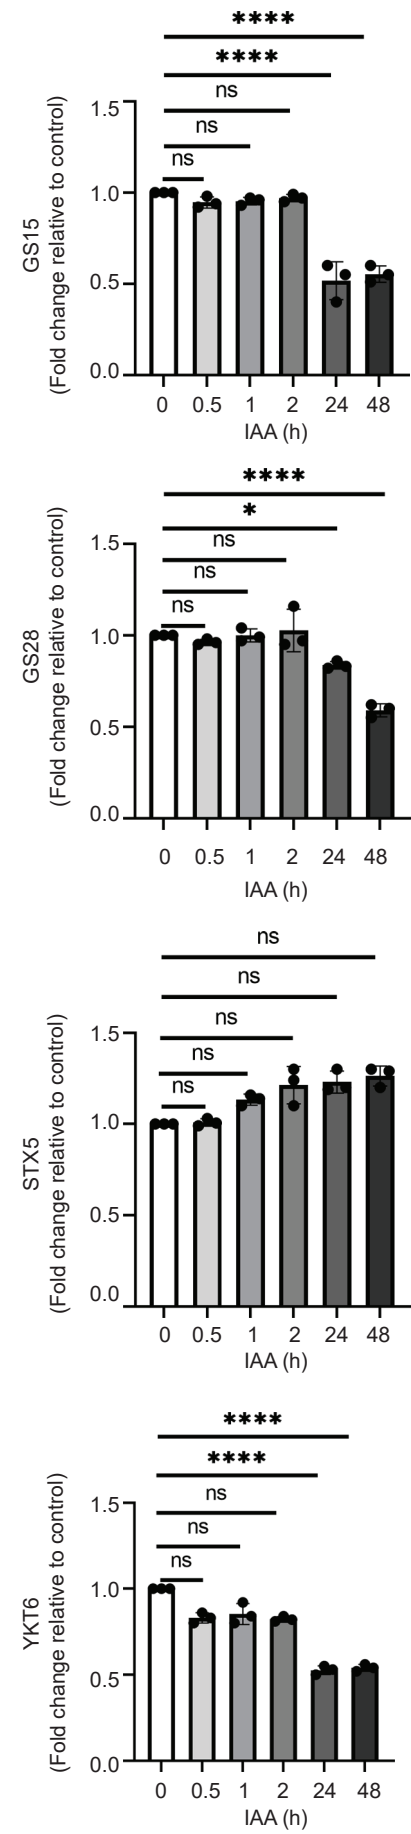

A

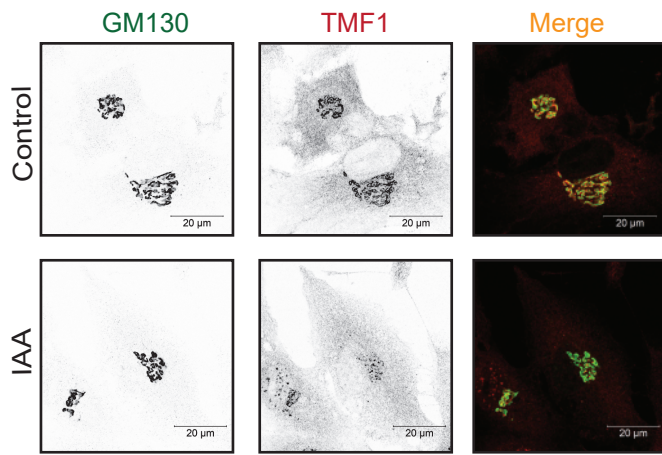

B

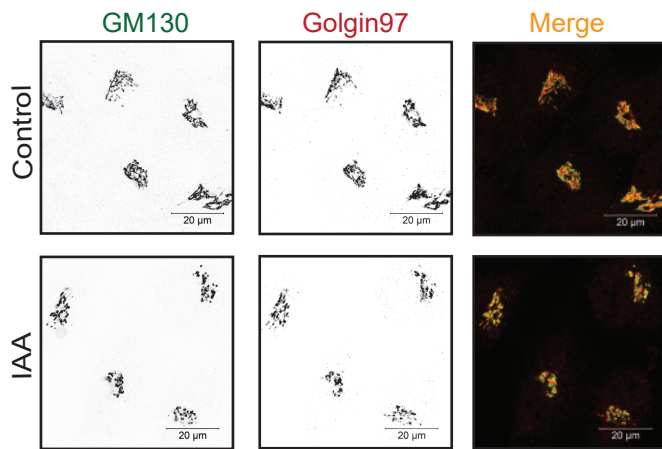

C

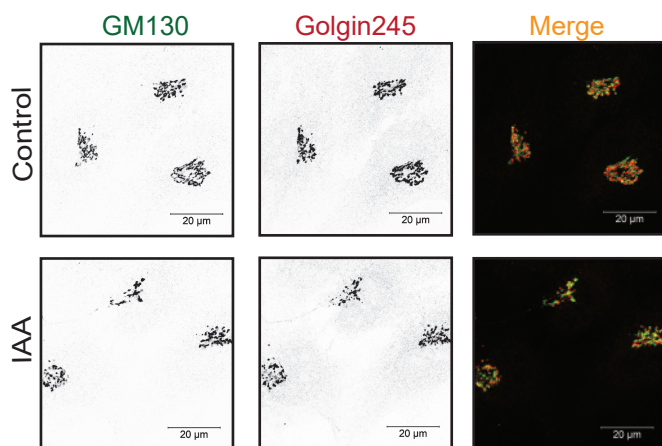

D

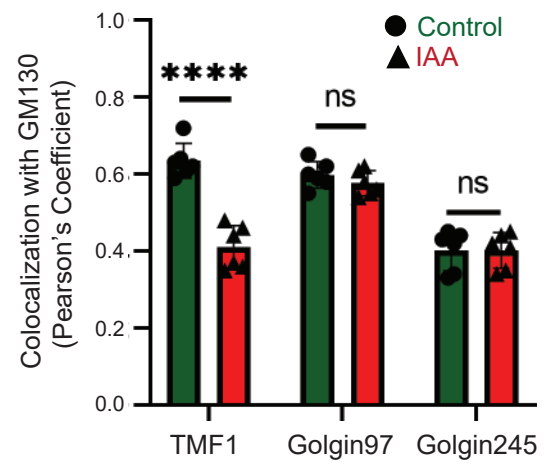

A

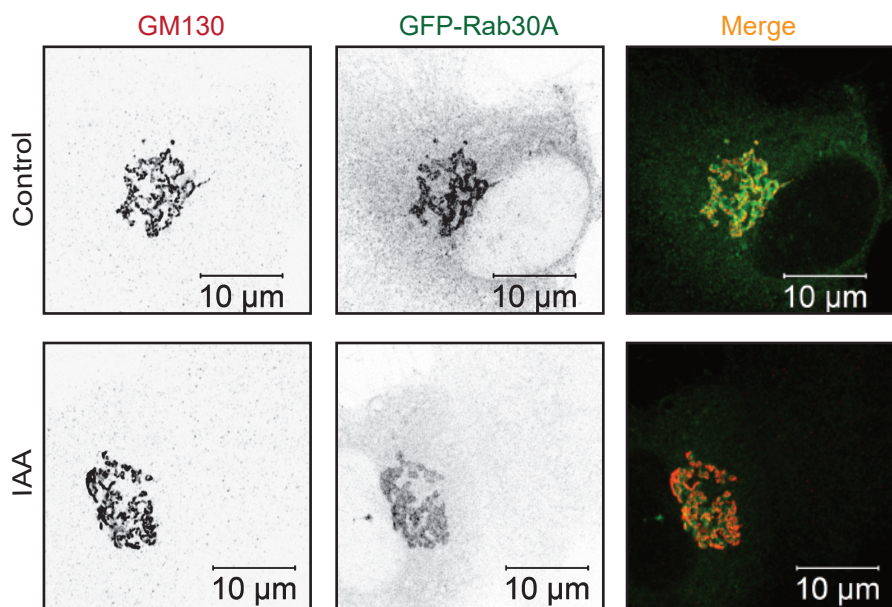

B

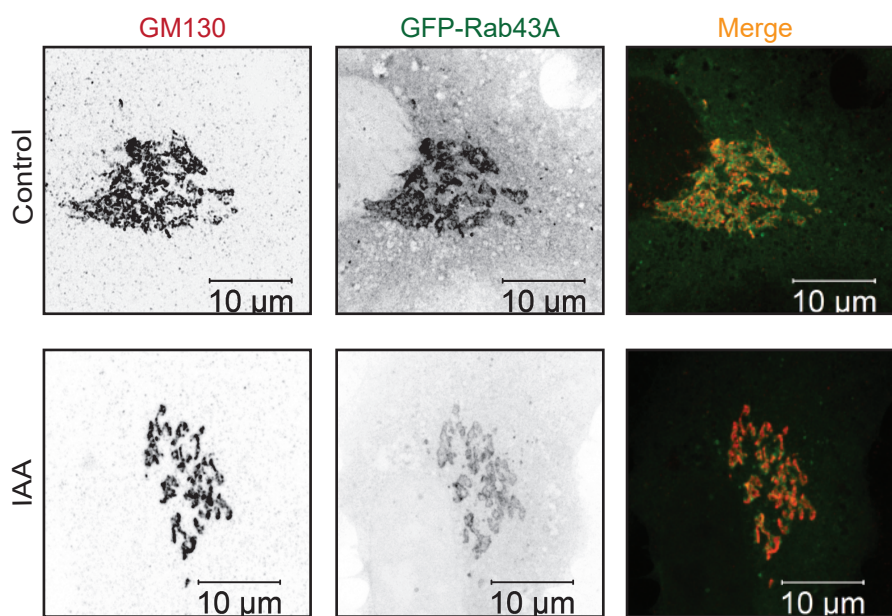

C

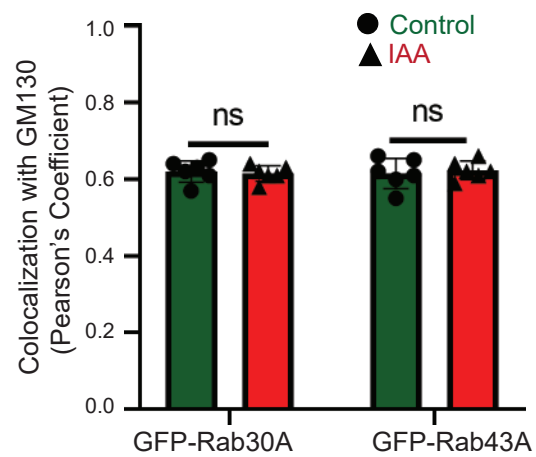

A

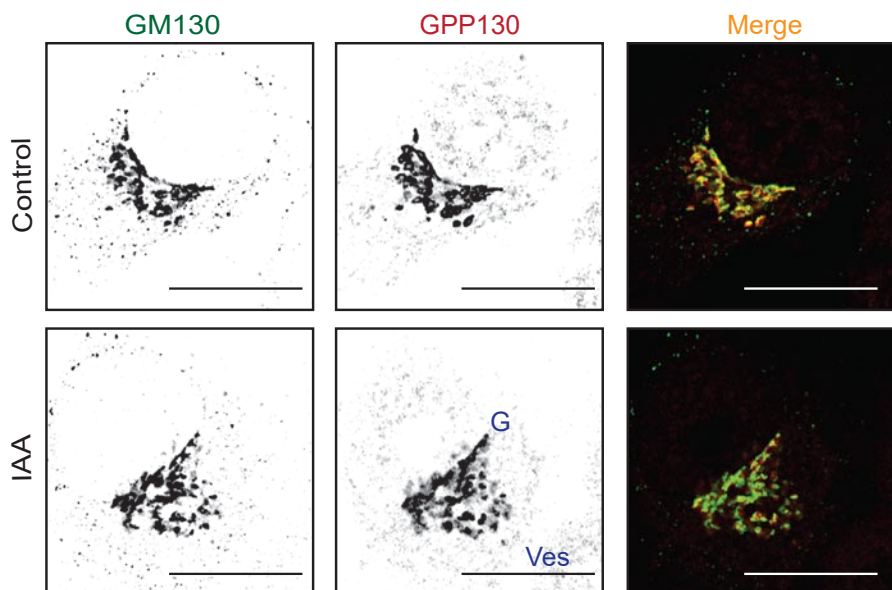

B

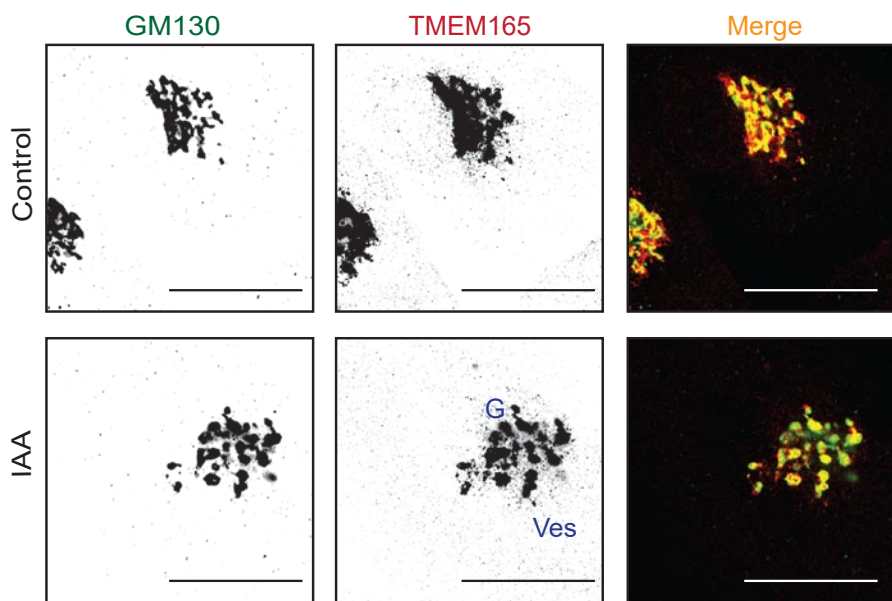

C

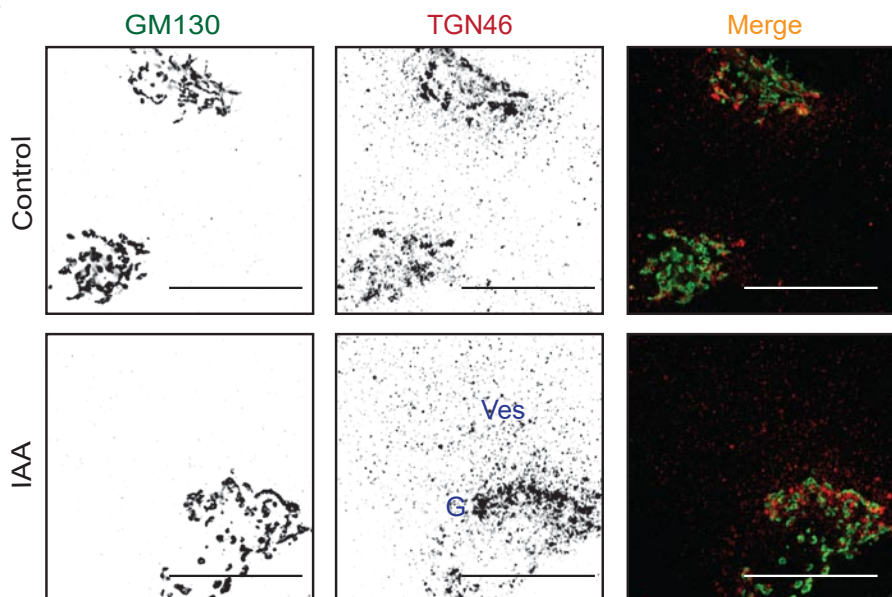

D

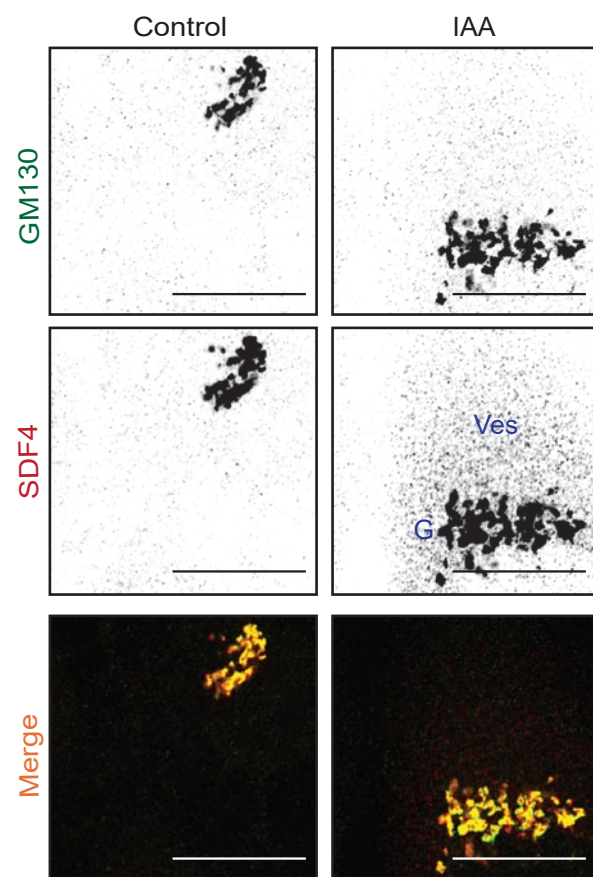

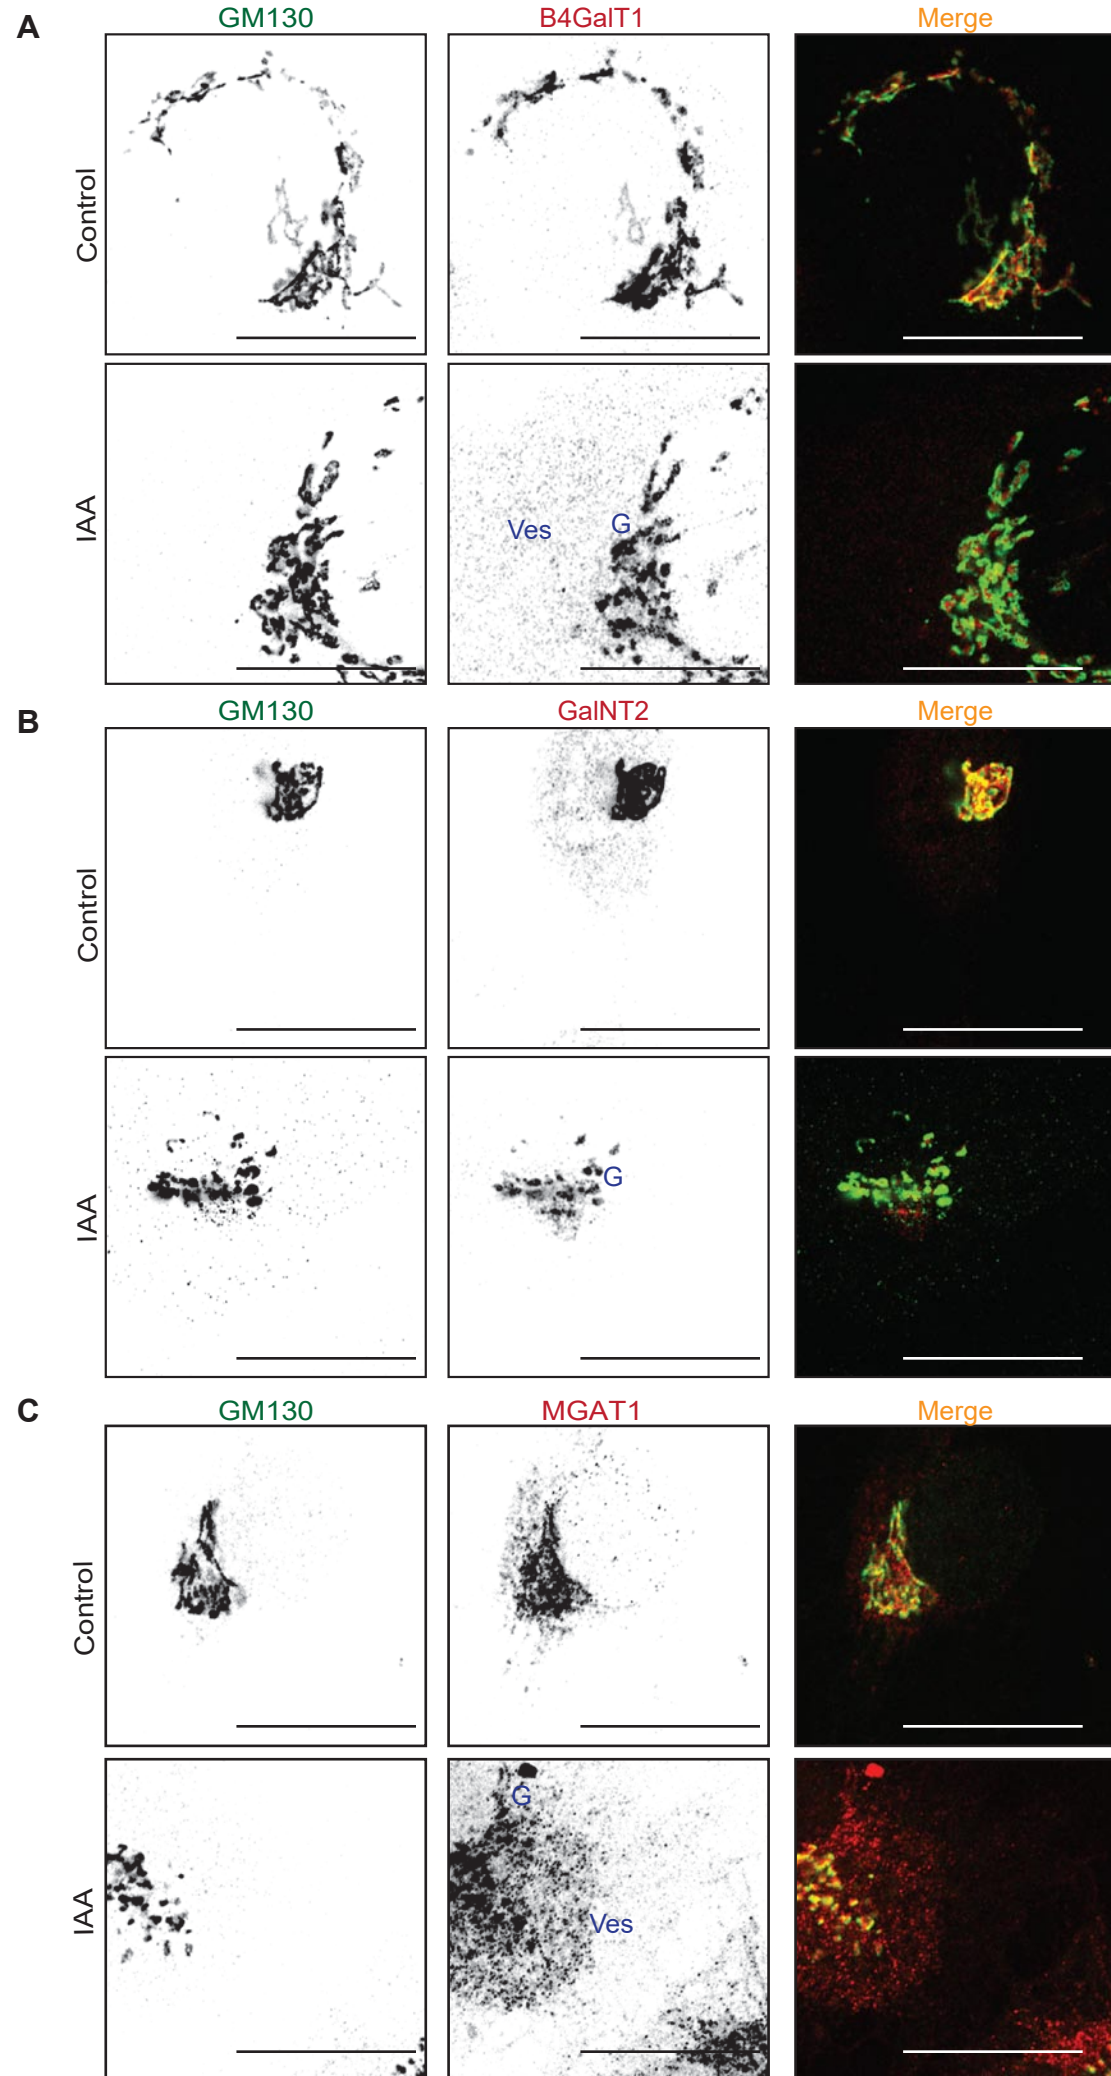

A

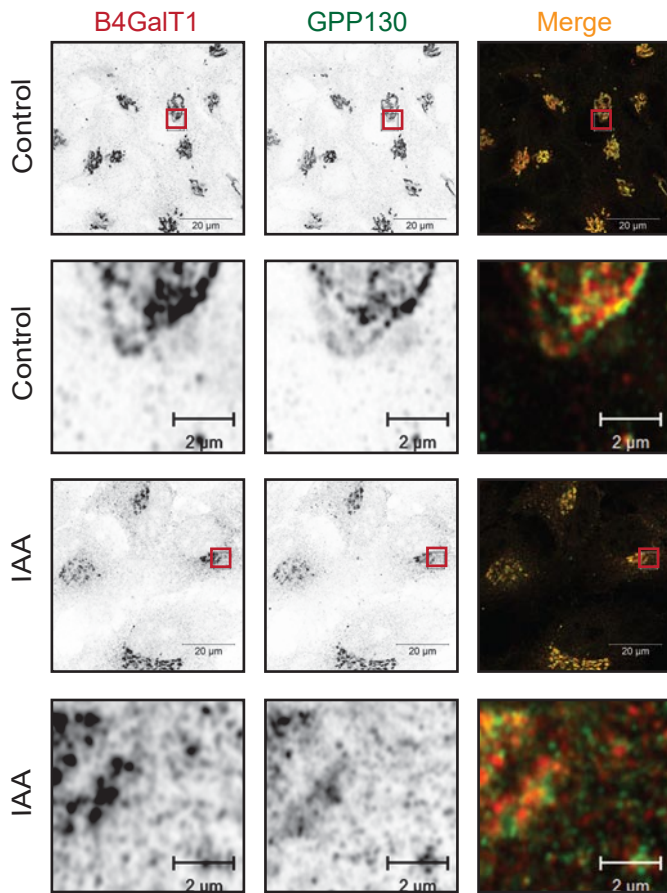

C

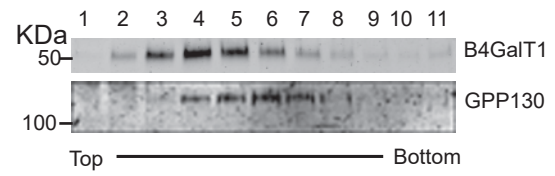

D

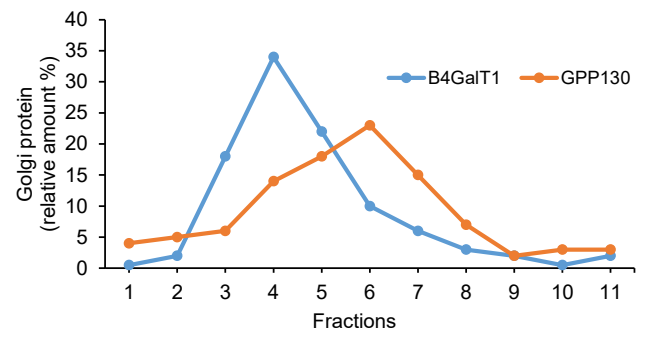

B

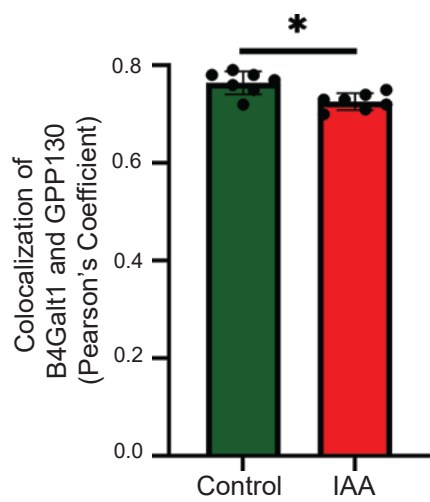



A

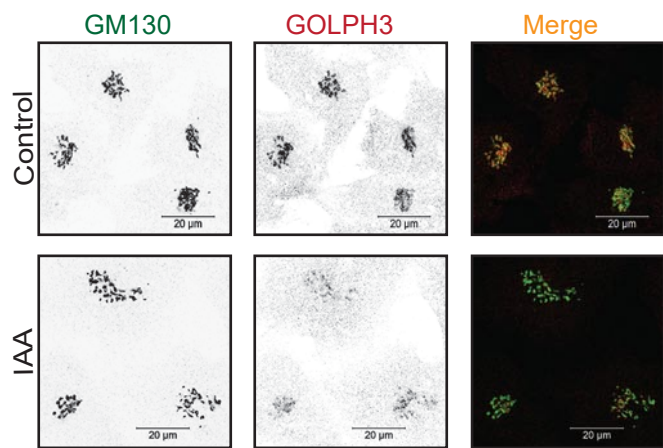

B

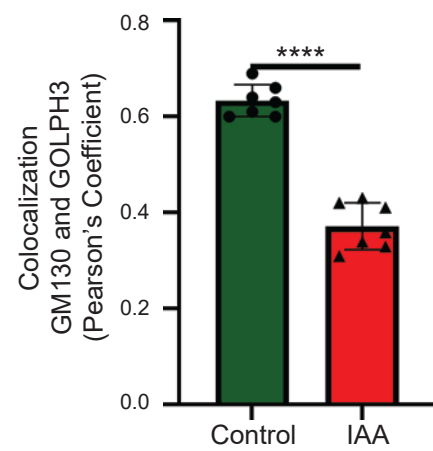

Supplement: TRA-24-52-s001.pdf [file TRA-24-52-s001.pdf]
